# Supplementary material for: A novel green route for the synthesis of N-phenylacetamides, benzimidazoles and acridinediones using Candida parapsilosis ATCC 7330
Source: Royal Society of Chemistry journal article supplement (doi:10.1039/c3ra44058c), 2013-01-01

**A novel green route for the synthesis of *N*-phenylacetamides, benzimidazoles and acridinediones using *Candida parapsilosis* ATCC 7330**

Pula Mahajabeen<sup>a</sup> and Anju Chadha<sup>a,b,\*</sup>

<sup>a</sup> *Laboratory of Bioorganic Chemistry, Department of Biotechnology, Indian Institute of Technology Madras, Chennai 600 036, India*

<sup>b</sup> *National Centre for Catalysis Research, Indian Institute of Technology Madras, Chennai 600 036, India*

Tel.: +91 44 2257 4106; Fax: +91 44 2257 4102, e-mail: [anjuc@iitm.ac.in](mailto:anjuc@iitm.ac.in)

**SUPPORTING INFORMATION**

**Table of Contents**

|                                                                                                                       |           |
|-----------------------------------------------------------------------------------------------------------------------|-----------|
| <b>General procedure for the synthesis of enaminones.....</b>                                                         | <b>2</b>  |
| <b>Preparation of standard amides .....</b>                                                                           | <b>2</b>  |
| <b>General procedure for the synthesis of benzimidazoles by whole cells of <i>C. parapsilosis</i> ATCC 7330... ..</b> | <b>2</b>  |
| <b>General procedure for the synthesis of acridinediones by whole cells of <i>C. parapsilosis</i> ATCC 7330.....</b>  | <b>3</b>  |
| <b>Spectral analysis of acridinediones.....</b>                                                                       | <b>4</b>  |
| <b>NMR spectra of deuterated and undeuterated <i>N</i>-(4-methoxyphenyl) acetamide.....</b>                           | <b>10</b> |
| <b>NMR spectra of deuterated and undeuterated 2-methylbenzimidazole.....</b>                                          | <b>12</b> |

### **General procedure for the synthesis of enaminones (4a-4e)<sup>1</sup>**

Equimolar mixture of cyclohexane-1,3-dione (112 mg, 1 mmol) was taken and mixed with the amine (1 equiv.) in a 50 ml RB flask. The unsealed RB flask containing the reaction mixture was kept in a beaker and irradiated with microwave radiation (domestic microwave oven of Power 300 W) for a specified period (6-20 min) to get the corresponding enaminones (75-89% yield). All the products were purified by column chromatography and characterized by spectral techniques.

### **Preparation of standard amides<sup>2</sup>**

4-Methoxyaniline (0.7 mL, 6.1 mmol, and 0.5 equiv.), acetic anhydride (0.7 mL, 7.3 mmol and 0.6 equiv.) and dry DCM (18 mL) were added to a round-bottom flask and the reaction mixture was stirred at room temperature and was monitored by TLC at regular intervals of time. After the completion of reaction, the reaction mixture was washed with a saturated solution of sodium carbonate, the organic layers were dried over anhydrous Na<sub>2</sub>SO<sub>4</sub> and the solvent was removed under reduced pressure. The reaction mixture was purified by column chromatography with hexane/ethyl acetate to get *N*-aryl amides in 50-68% yield.

### **General procedure for the synthesis of benzimidazoles using whole cells of *C. parapsilosis* ATCC 7330**

2-phenylenediamine **1g** (0.67 mmol, 72 mg) dissolved in ethanol (1.5 mL) was added into a 150 mL Erlenmeyer flask containing the cells (18 g wet wt) in water (15 mL) and stirred on an orbital shaker at 200 rpm for 24 h at 35 °C. The reaction was performed in triplicates. The conversions were determined by HPLC using a C18 column with flow rate of 0.5 mL/min using acetonitrile: water (40:60) as eluent. After completion of the reaction, the reaction mixture was extracted by ethylacetate (3 X 10 mL) the organic layer was dried over anhydrous sodium sulphate and concentrated under high vacuum. The crude product was purified by column chromatography on silica gel (mesh size 100–200) using ethyl acetate and hexane mixture (80:20), to give the product in 84% yield. Similar procedure was followed for other diamines. Under identical conditions control experiments were done without whole cells. All the products were characterised by <sup>1</sup>H, <sup>13</sup>C NMR and IR spectroscopy.

### **General procedure for the synthesis of acridinediones using whole cells of *C. parapsilosis* ATCC 7330**

3-(phenylamino)cyclohex-2-enone **4a** (0.37 mmol, 72 mg) dissolved in ethanol (1.5 mL) was added into a 150 mL Erlenmeyer flask containing the cells (18 g wet wt) in water (15 mL) and stirred on an orbital shaker at 200 rpm for 24 h at 35 °C. The reaction was performed in triplicates. The conversions were determined by HPLC using a C18 column with flow rate of 0.5 mL/min using acetonitrile: water (85:15) as eluent. After completion of the reaction, the reaction mixture was extracted by ethylacetate (3 X 10 mL) the organic layer was dried over anhydrous sodium sulphate and concentrated under high vacuum. The crude product was purified by column chromatography on silica gel (mesh size 100–200) using dichloromethane and methanol mixture (99:01), to give the product in 48% yield. Similar procedure was followed for other diamines. Under identical conditions control experiments were done without whole cells. All the products were characterised by <sup>1</sup>H, <sup>13</sup>C NMR and IR spectroscopy.

### **References**

1. C. K. Z. Andrade, A. F. S. Barreto and W. A. Silva, *Arkivoc*, 2008 (xii), 226-232.
2. F. Zhou, X. Han, X. Lu, *Tetrahedron Lett.*, 2011, **52**, 4681-4685.

## Spectral analysis of acridinediones

### $^1\text{H}$ NMR spectrum of 5a

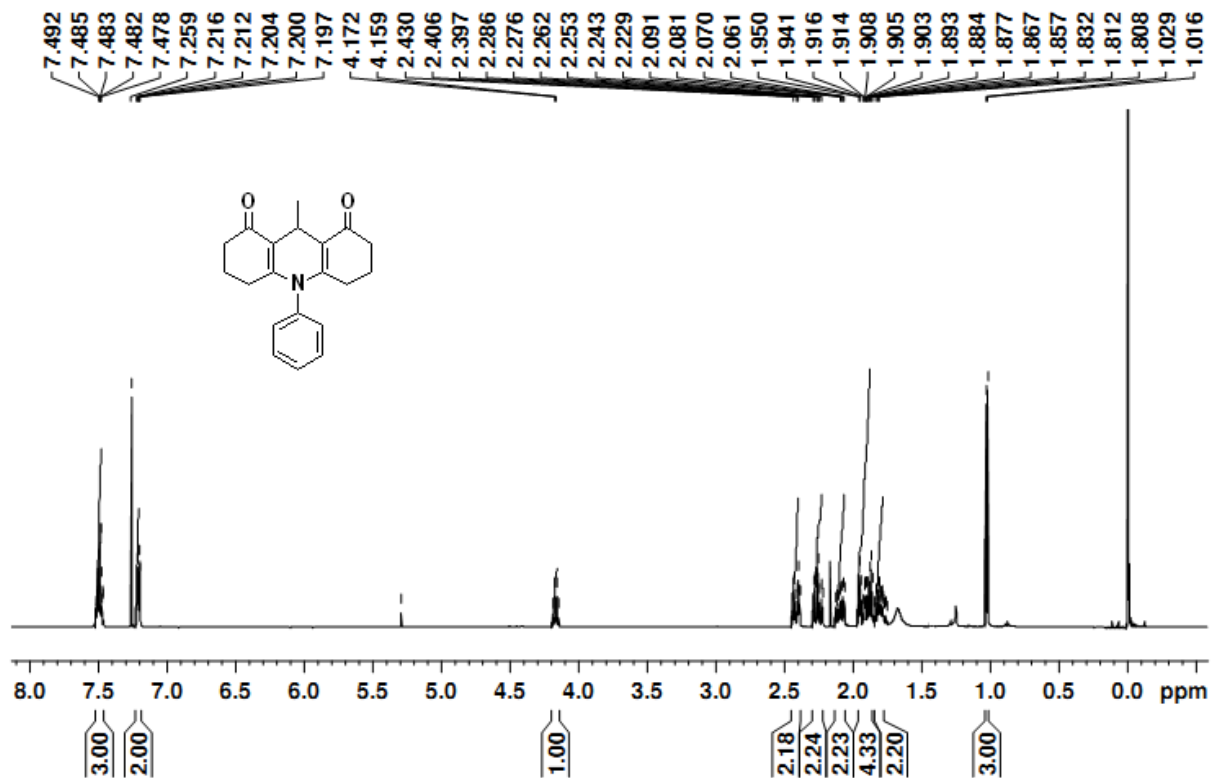

### $^{13}\text{C}$ NMR spectrum of 5a

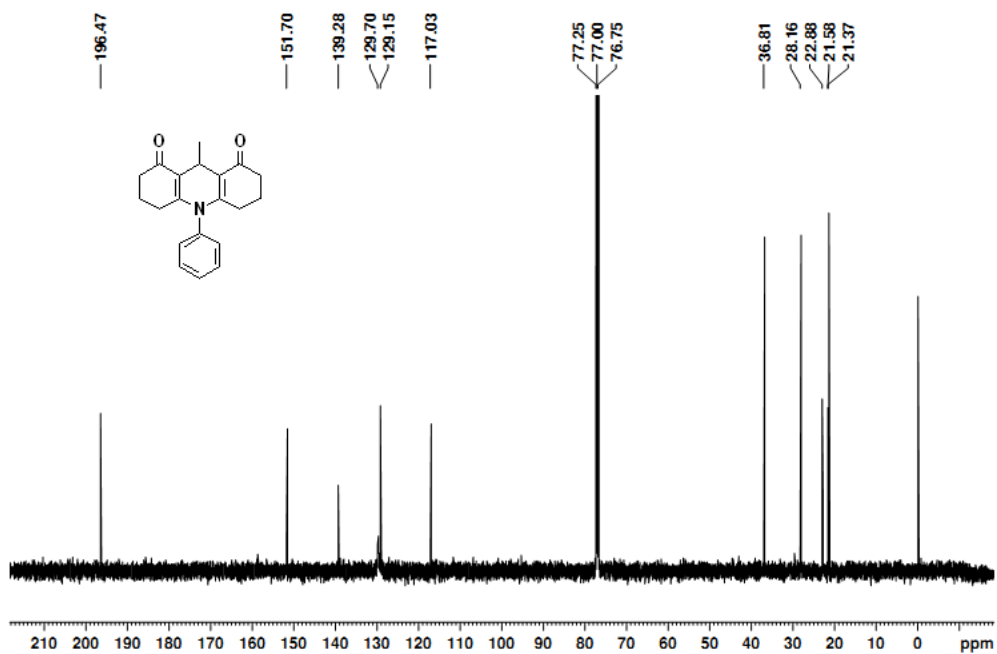

### HRMS data for 5a

#### Single Mass Analysis

Tolerance = 200.0 mDa / DBE: min = -1.5, max = 50.0

Isotope cluster parameters: Separation = 1.0 Abundance = 1.0%

Monoisotopic Mass, Odd and Even Electron Ions

3 formula(e) evaluated with 1 results within limits (all results (up to 1000) for each mass)

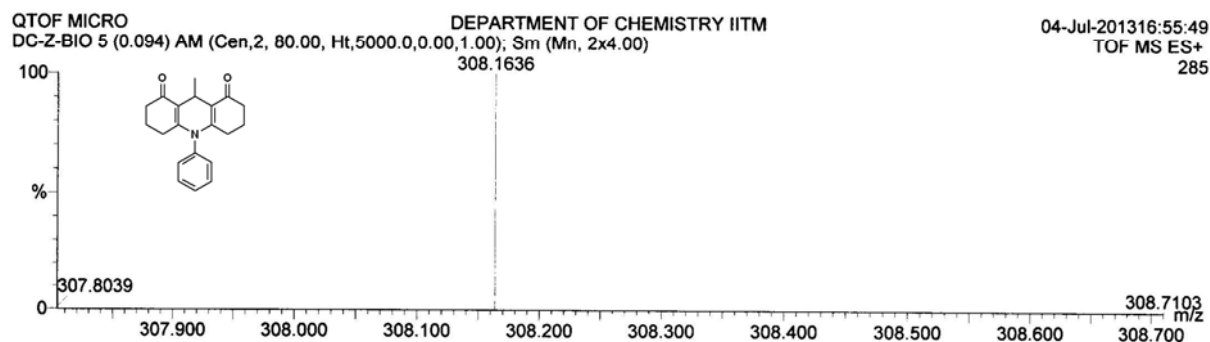

|          |            |      |      |      |       |              |  |
|----------|------------|------|------|------|-------|--------------|--|
| Minimum: |            |      |      |      |       |              |  |
| Maximum: | 200.0      | 5.0  |      | -1.5 |       |              |  |
|          |            |      |      | 50.0 |       |              |  |
| Mass     | Calc. Mass | mDa  | PPM  | DBE  | Score | Formula      |  |
| 308.1636 | 308.1651   | -1.4 | -4.7 | 10.5 | 1     | C20 H22 N O2 |  |

### <sup>1</sup>H NMR spectrum of 5b

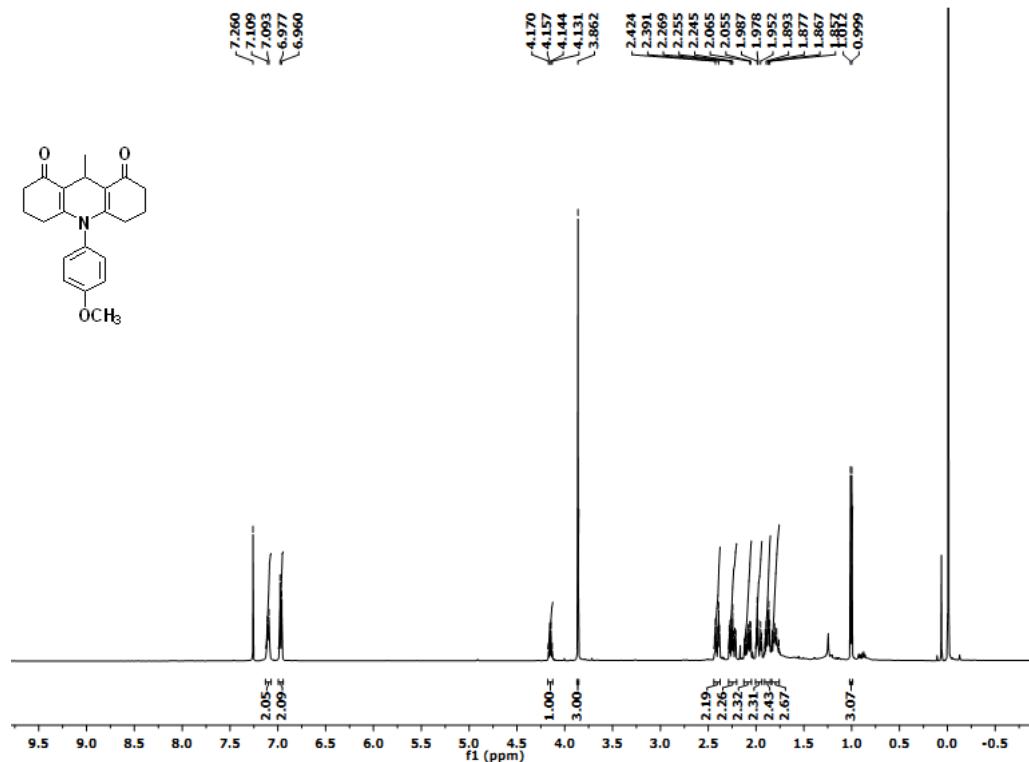

### <sup>13</sup>C NMR spectrum of 5b

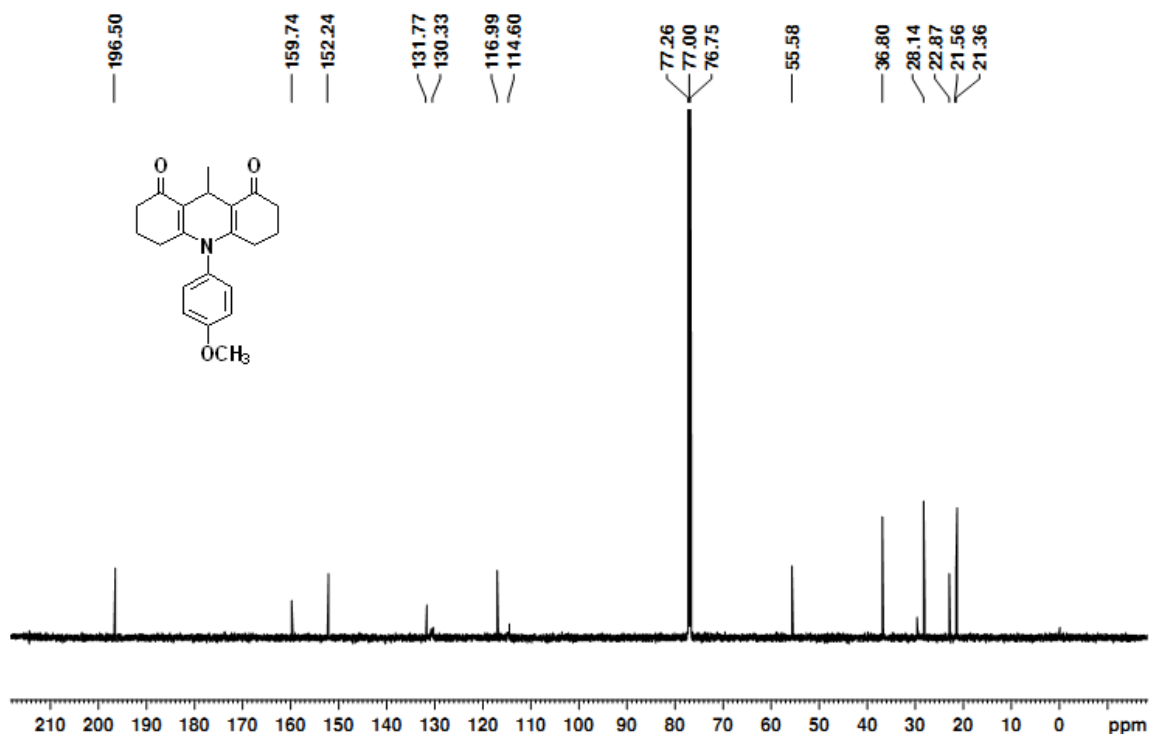

### HRMS data for 5b

#### Single Mass Analysis

Tolerance = 200.0 mDa / DBE: min = -1.5, max = 50.0

Isotope cluster parameters: Separation = 1.0 Abundance = 1.0%

Monoisotopic Mass, Odd and Even Electron Ions

3 formula(e) evaluated with 1 results within limits (all results (up to 1000) for each mass)

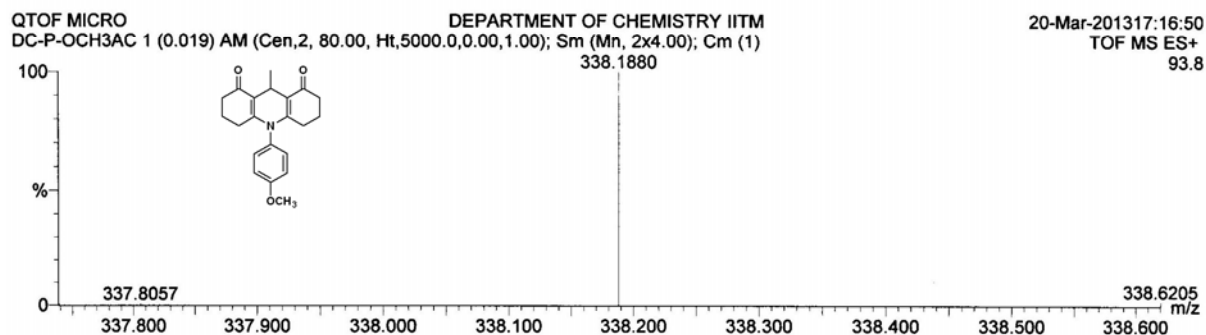

| Mass     | Calc. Mass | mDa  | PPM  | DBE  | Score | Formula      |
|----------|------------|------|------|------|-------|--------------|
| 338.1880 | 338.1882   | -0.2 | -0.7 | 10.0 | 1     | C21 H24 N O3 |

### <sup>1</sup>H NMR spectrum of 5c

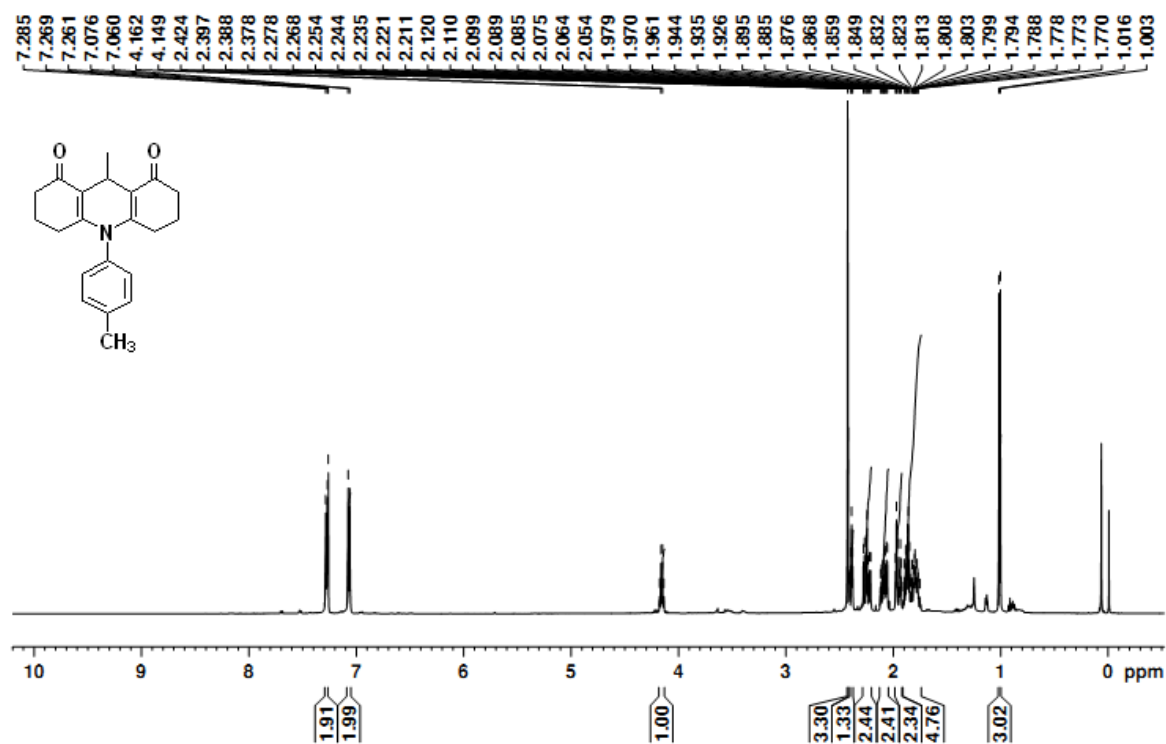

### <sup>13</sup>C NMR spectrum of 5c

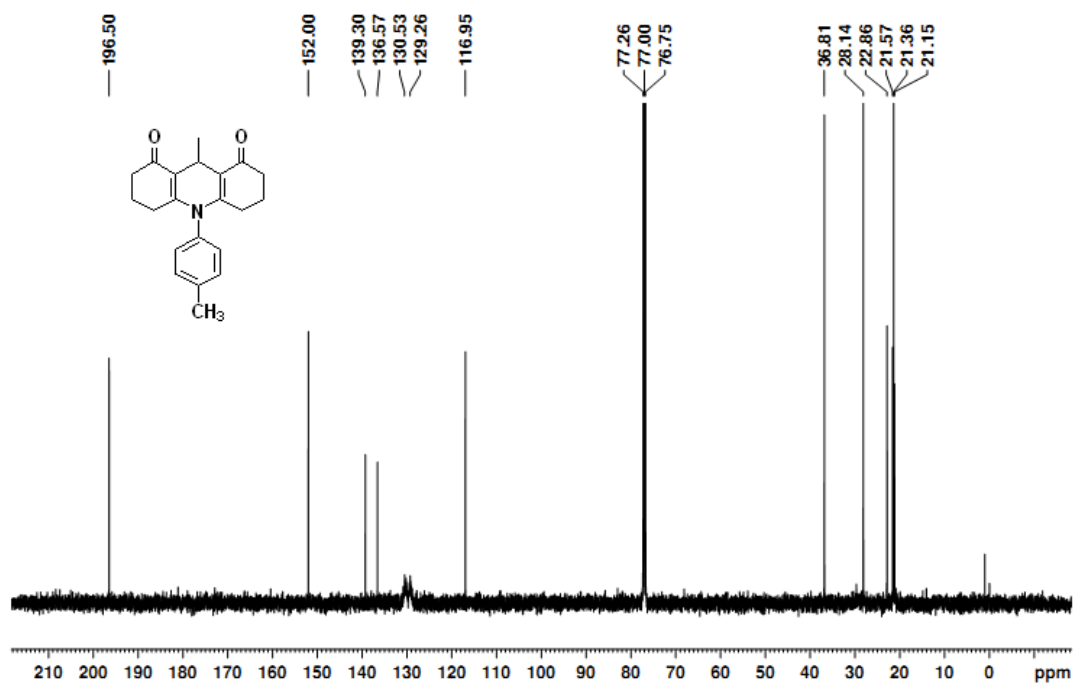

### HRMS data for 5c

#### Single Mass Analysis

Tolerance = 200.0 mDa / DBE: min = -1.5, max = 50.0

Isotope cluster parameters: Separation = 1.0 Abundance = 1.0%

Monoisotopic Mass, Odd and Even Electron Ions

3 formula(e) evaluated with 1 results within limits (all results (up to 1000) for each mass)

QTOF MICRO

DC-214 1 (0.038) AM (Cen,2, 80.00, Ht,5000.0,0.00,1.00); Sm (Mn, 2x4.00); Cm (1)

DEPARTMENT OF CHEMISTRY IITM

16-Apr-2013 12:15:20

TOF MS ES+

115

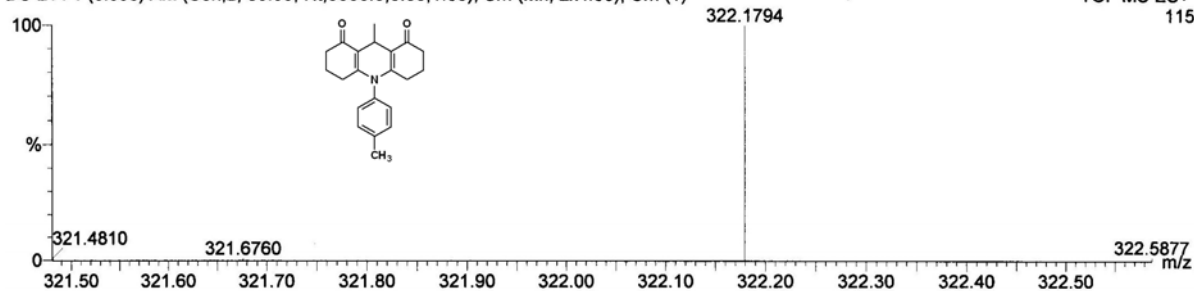

Minimum: -1.5  
Maximum: 200.0 5.0 50.0

| Mass     | Calc. Mass | mDa  | PPM  | DBE  | Score | Formula      |
|----------|------------|------|------|------|-------|--------------|
| 322.1794 | 322.1807   | -1.3 | -4.0 | 10.5 | 1     | C21 H24 N O2 |

### <sup>1</sup>H NMR spectrum of 5d

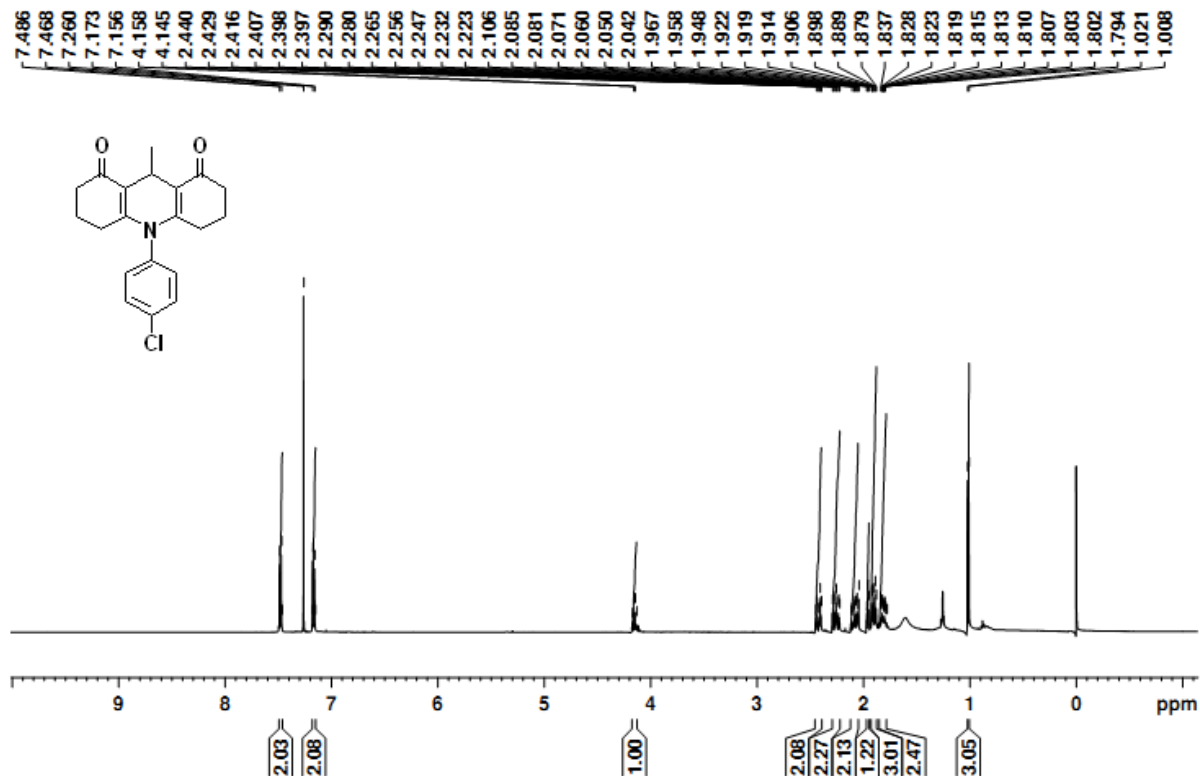



### <sup>13</sup>C NMR spectrum of 5d

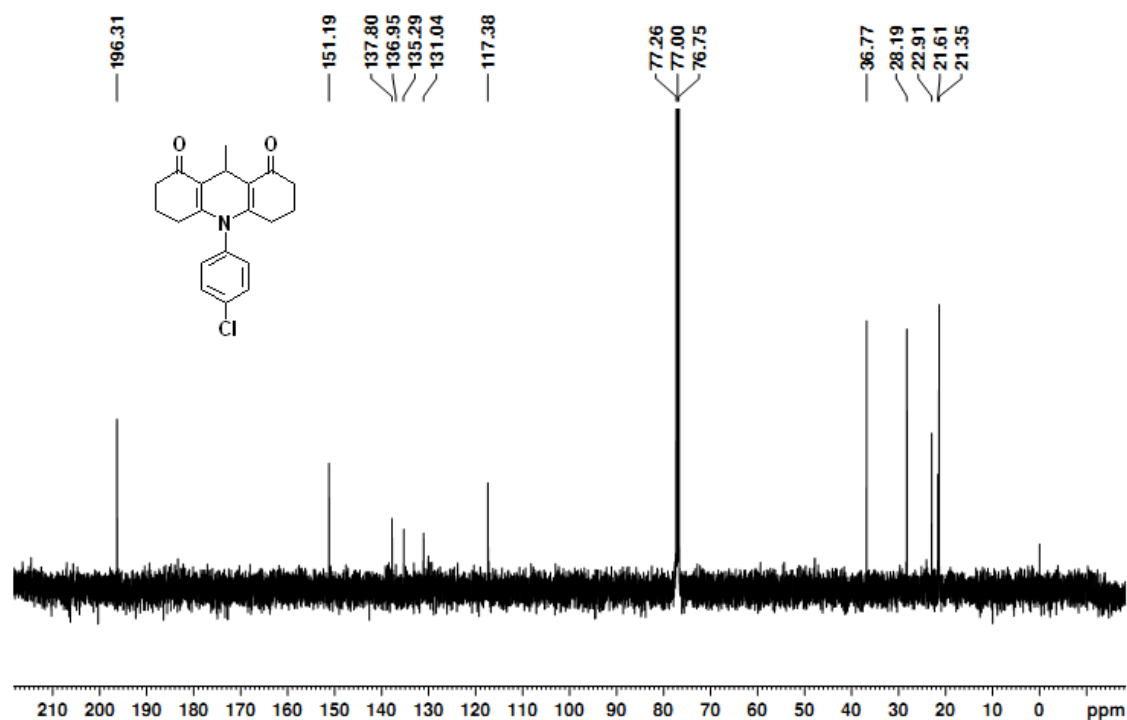

### HRMS data for 5d

#### Single Mass Analysis

Tolerance = 200.0 mDa / DBE: min = -1.5, max = 50.0

Isotope cluster parameters: Separation = 1.0 Abundance = 1.0%

Monoisotopic Mass, Odd and Even Electron Ions

9 formula(e) evaluated with 1 results within limits (all results (up to 1000) for each mass)

QTOF MICRO

DEPARTMENT OF CHEMISTRY IITM  
 DC-216 24 (0.449) AM (Cen,2, 80.00, Ht,5000.0,0.00,1.00); Sm (Mn, 2x4.00)

20-Mar-2013 16:44:11  
 TOF MS ES+  
 82.3

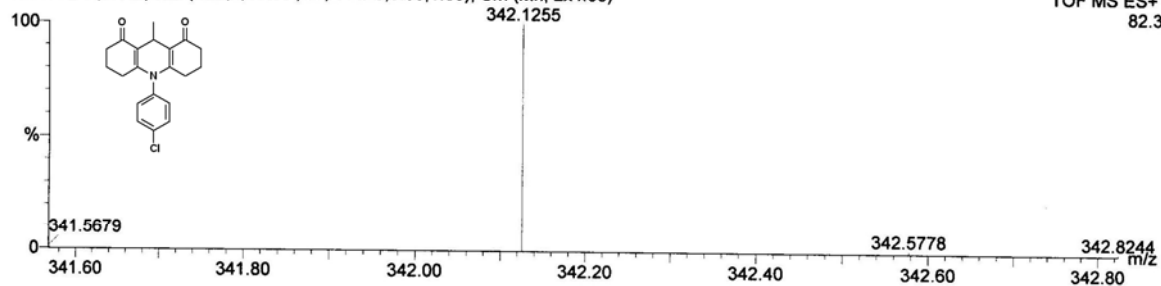

Minimum:

Maximum: 200.0 5.0 -1.5 50.0

| Mass     | Calc. Mass | mDa  | PPM  | DBE  | Score | Formula                                             |
|----------|------------|------|------|------|-------|-----------------------------------------------------|
| 342.1255 | 342.1261   | -0.6 | -1.8 | 10.5 | 1     | C <sub>20</sub> H <sub>21</sub> N O <sub>2</sub> Cl |

### NMR spectra of deuterated and undeuterated *N*-(4-methoxyphenyl) acetamide

#### <sup>1</sup>H NMR spectrum of 3a

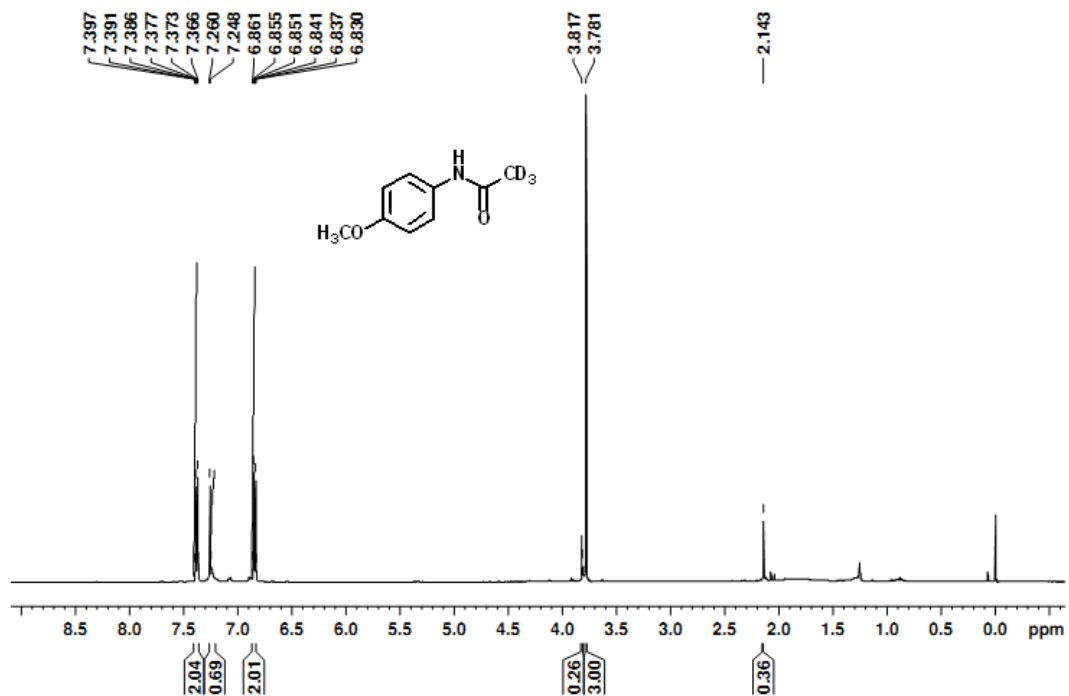

#### <sup>13</sup>C NMR spectrum of 3a

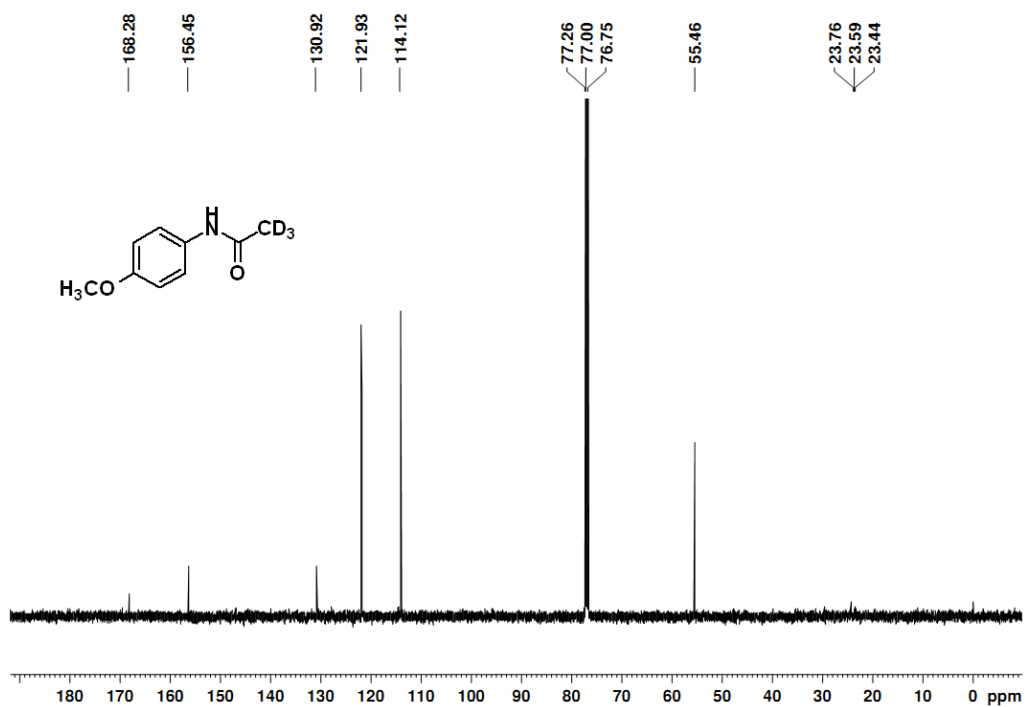

### <sup>1</sup>H NMR spectrum of 2b

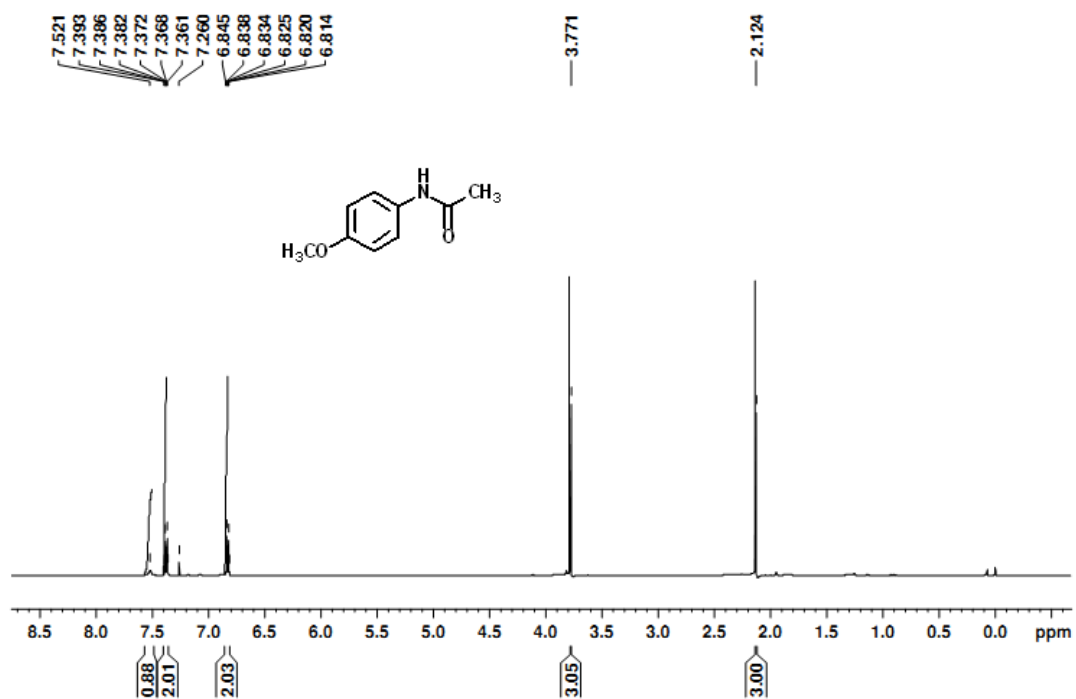

### <sup>13</sup>C NMR spectrum of 2b

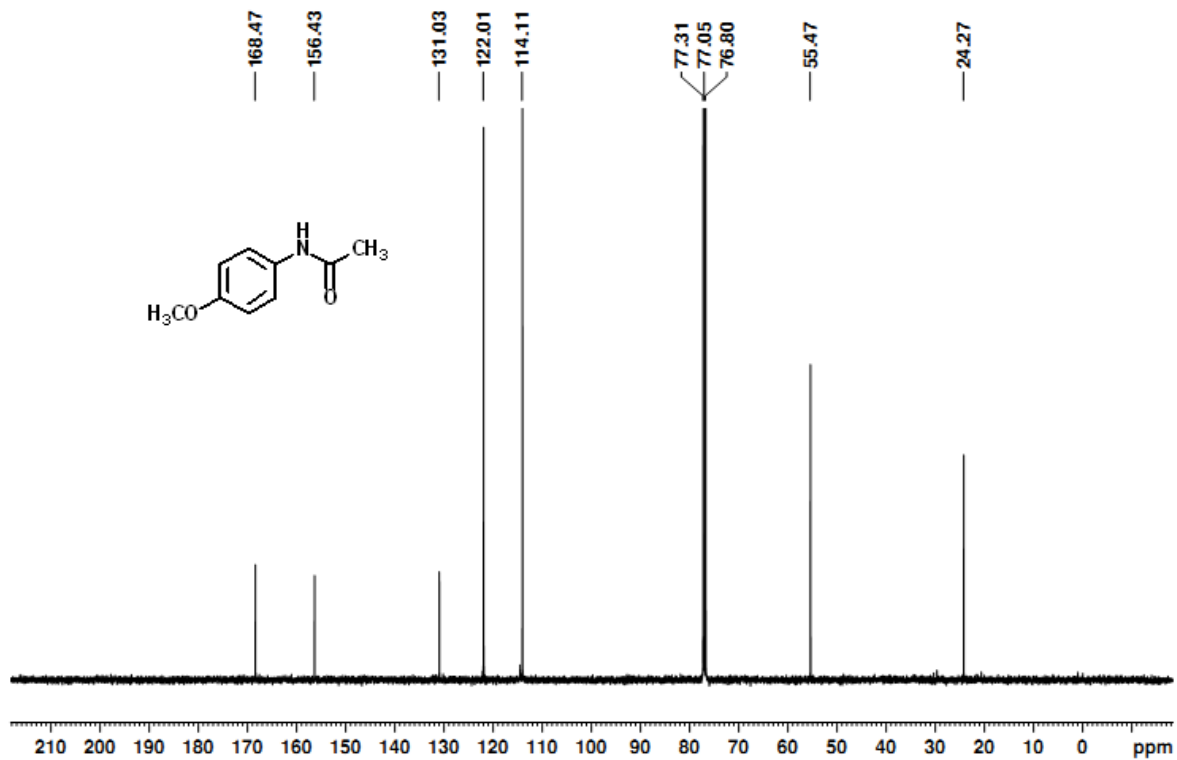

### NMR spectra of deuterated and undeuterated 2-methylbenzimidazole

#### <sup>1</sup>H NMR spectrum of 3b

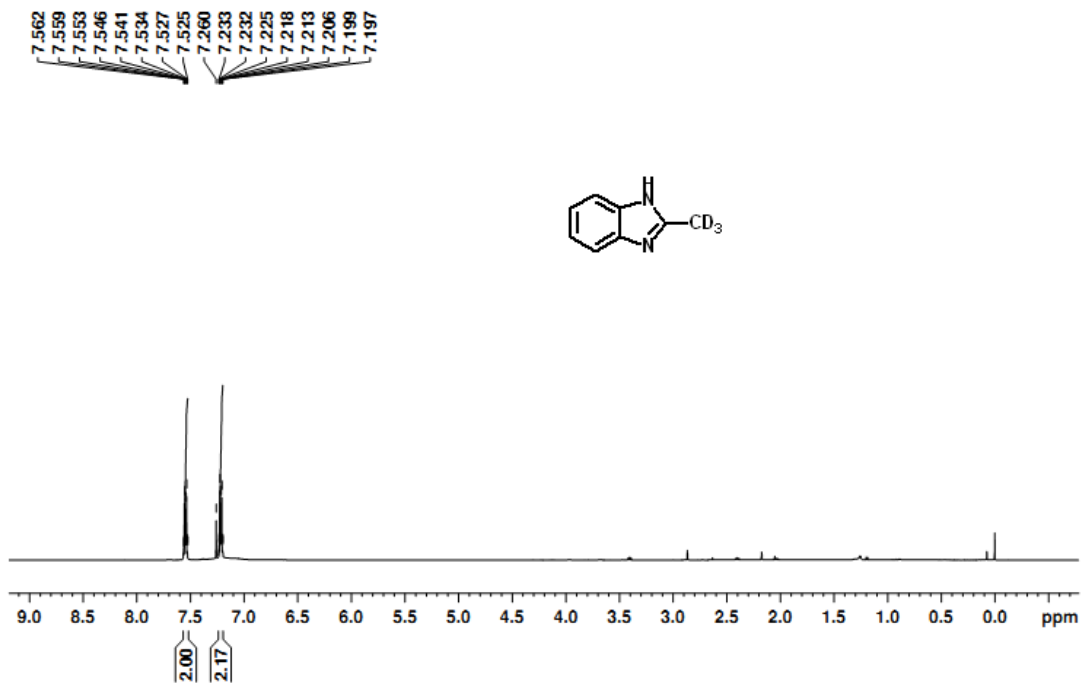

#### <sup>13</sup>C NMR spectrum of 3b

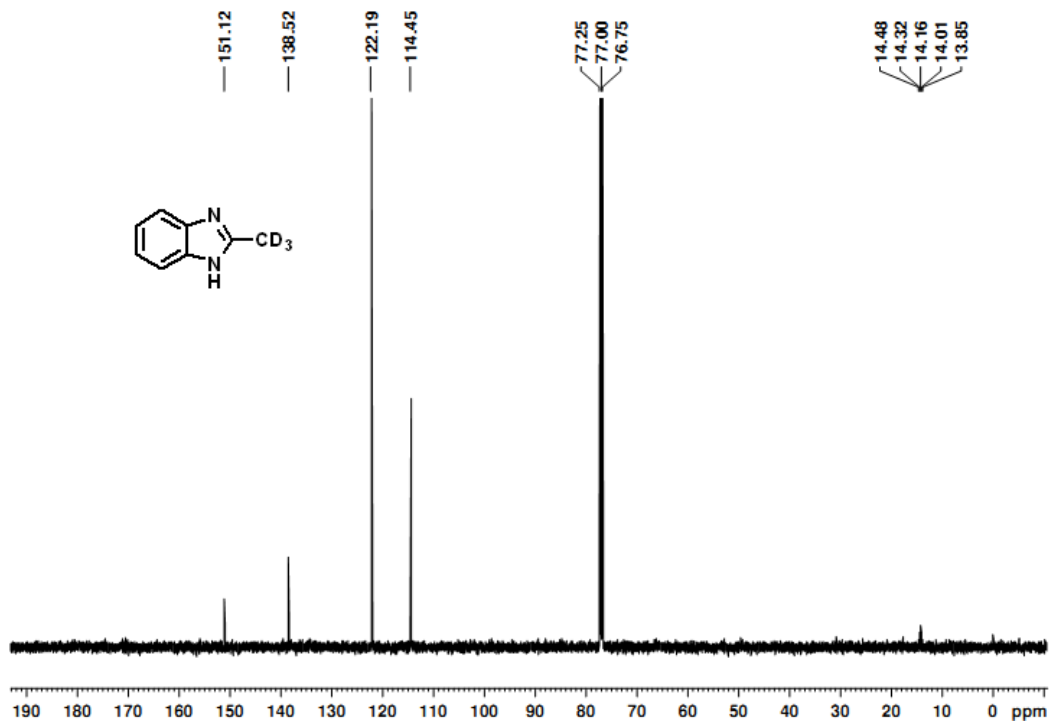

### $^1\text{H}$ NMR spectrum of 2g

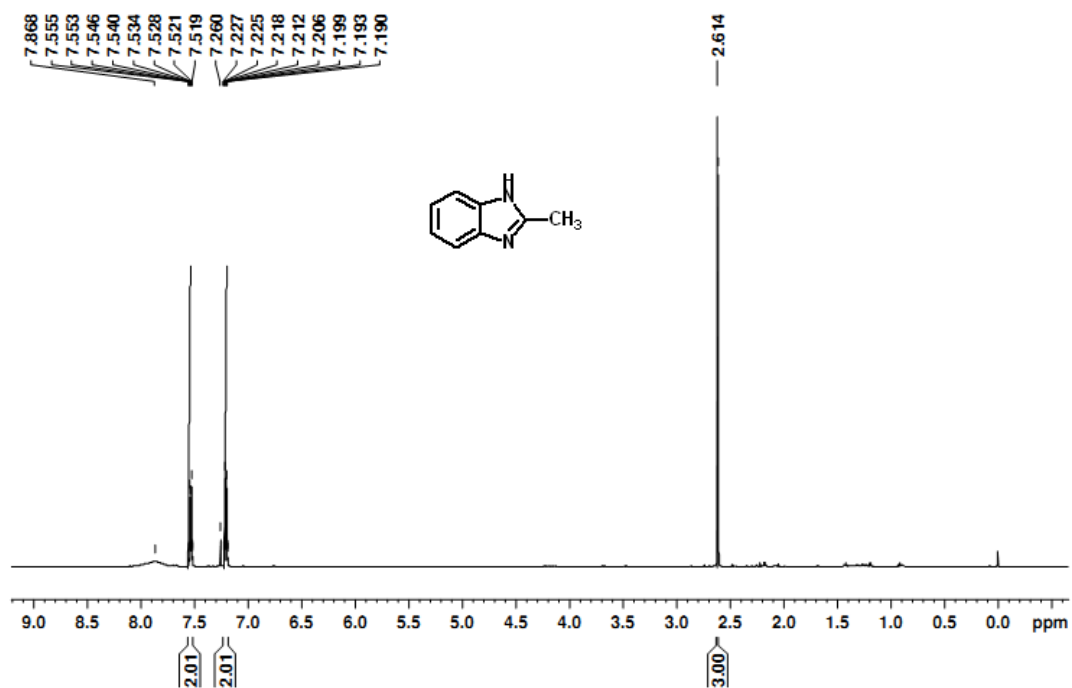

### $^{13}\text{C}$ NMR spectrum of 2g

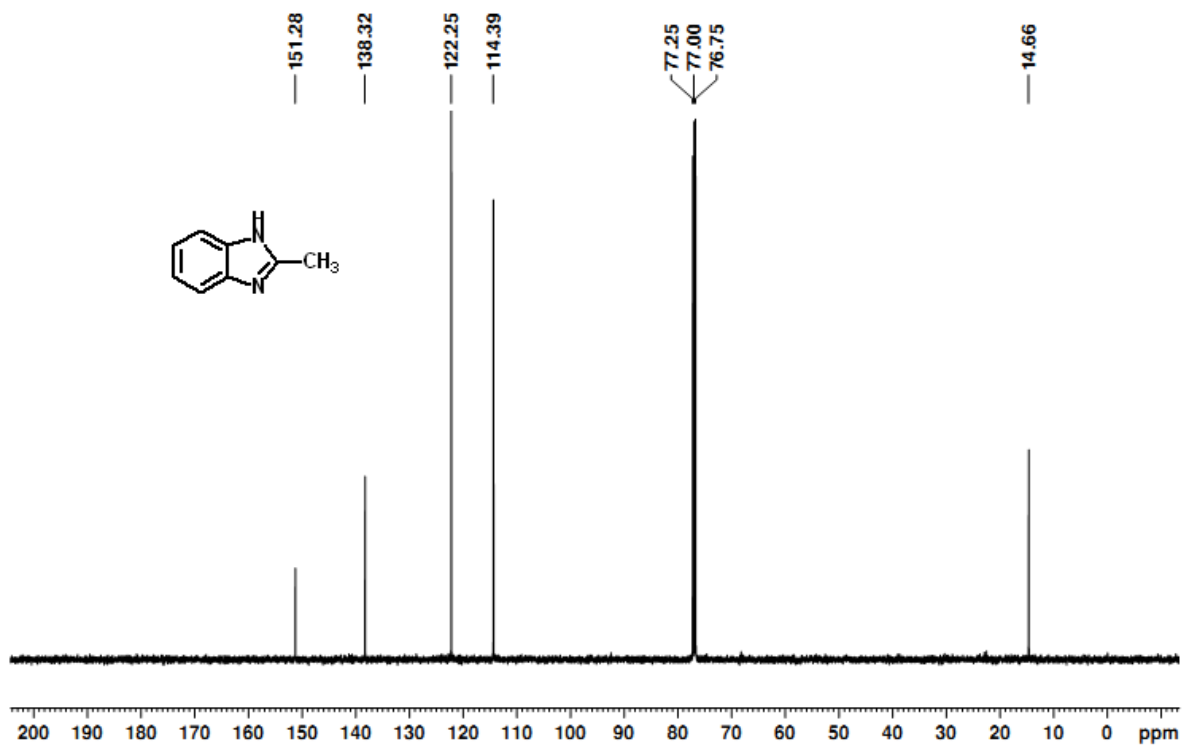

Supplement: c3ra44058c.pdf [file c3ra44058c.pdf]
